# Supplementary figures and images for: Axons-on-a-chip for mimicking non-disruptive diffuse axonal injury underlying traumatic brain injury
Source: Royal Society of Chemistry journal article supplement (doi:10.1039/d2lc00730d), 2022-01-01

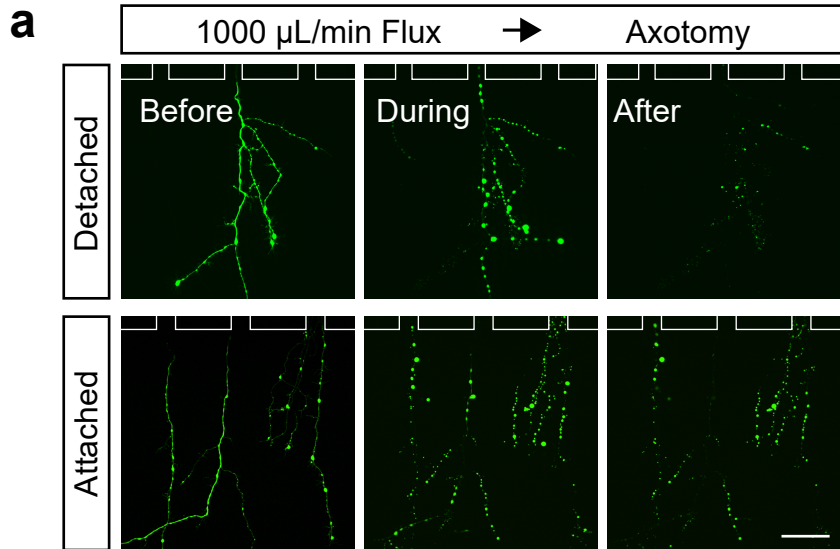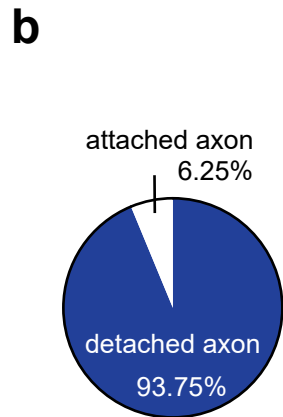

sFig. 1

Supplement: d2lc00730d2.pdf [file d2lc00730d2.pdf]

**a**

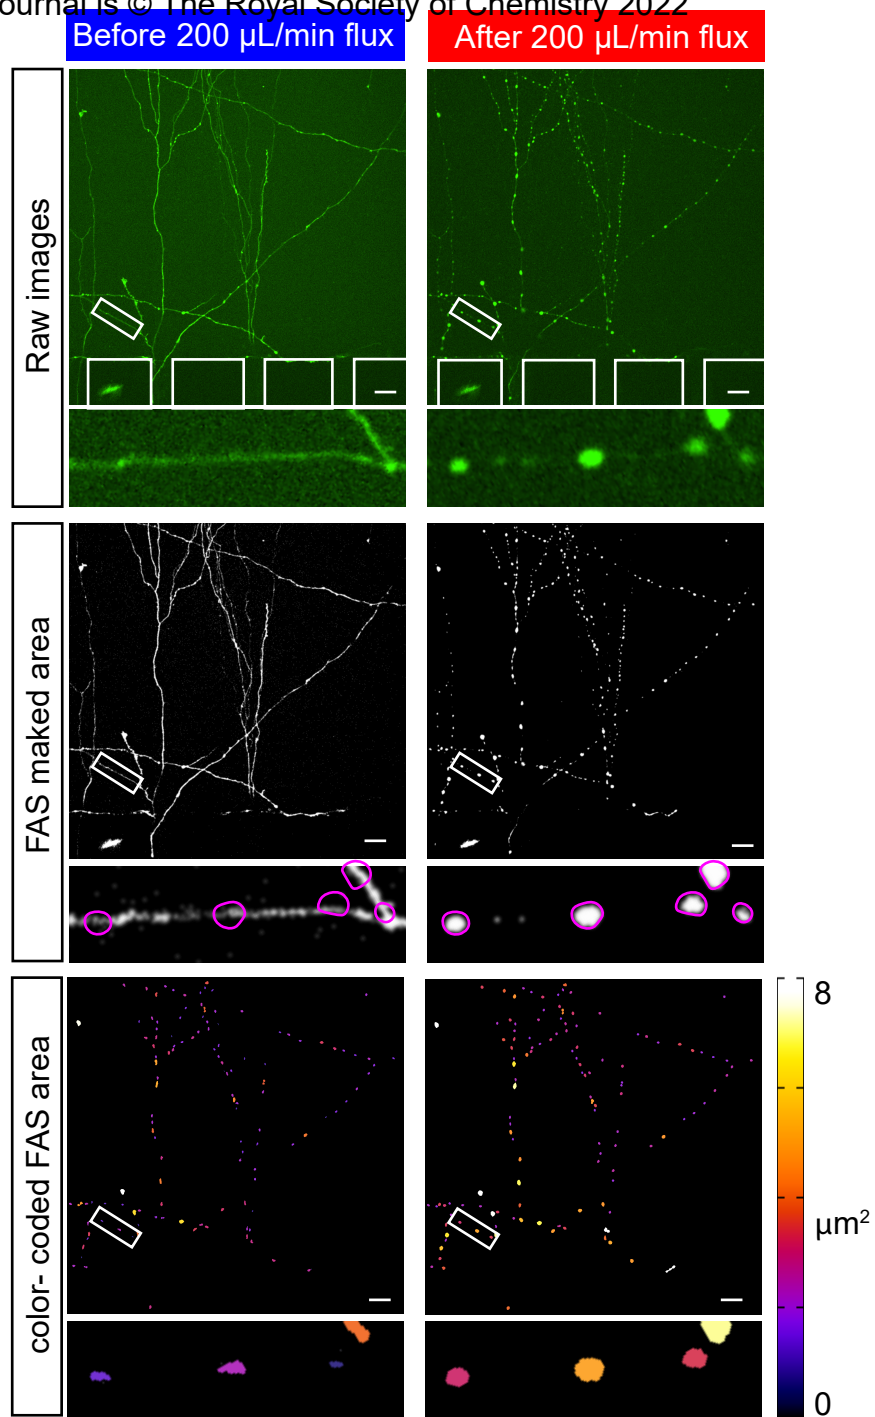

**b**

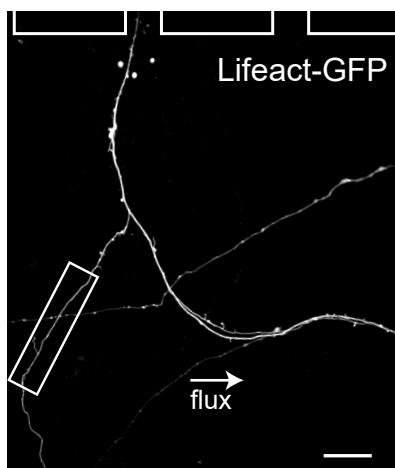

**c**

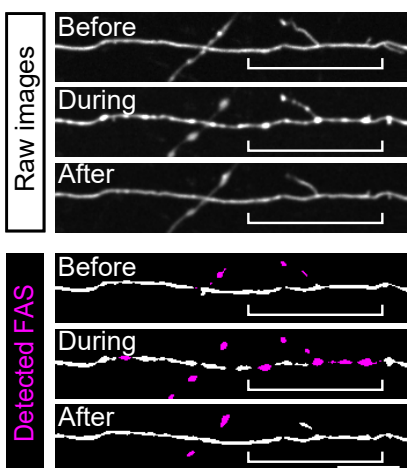

**d**

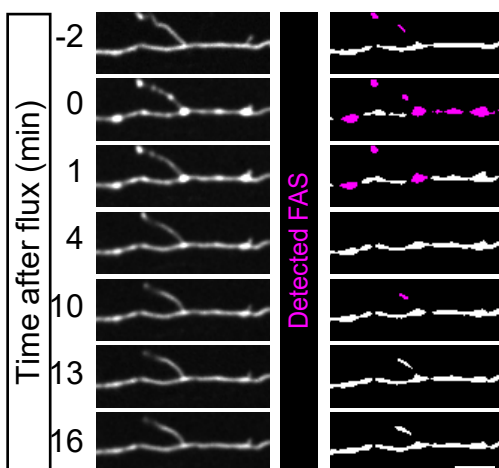

sFig. 2

Supplement: d2lc00730d3.pdf [file d2lc00730d3.pdf]
